# Supplementary material for: Integrated SMRT Technology with UMI RNA-Seq Reveals the Hub Genes in Stamen Petalody in Camellia oleifera
Source: MDPI journal article supplement (doi:10.3390/f12060749), 2021-06-06
Supplement: s1 [file s1]

## Supplementary Materials

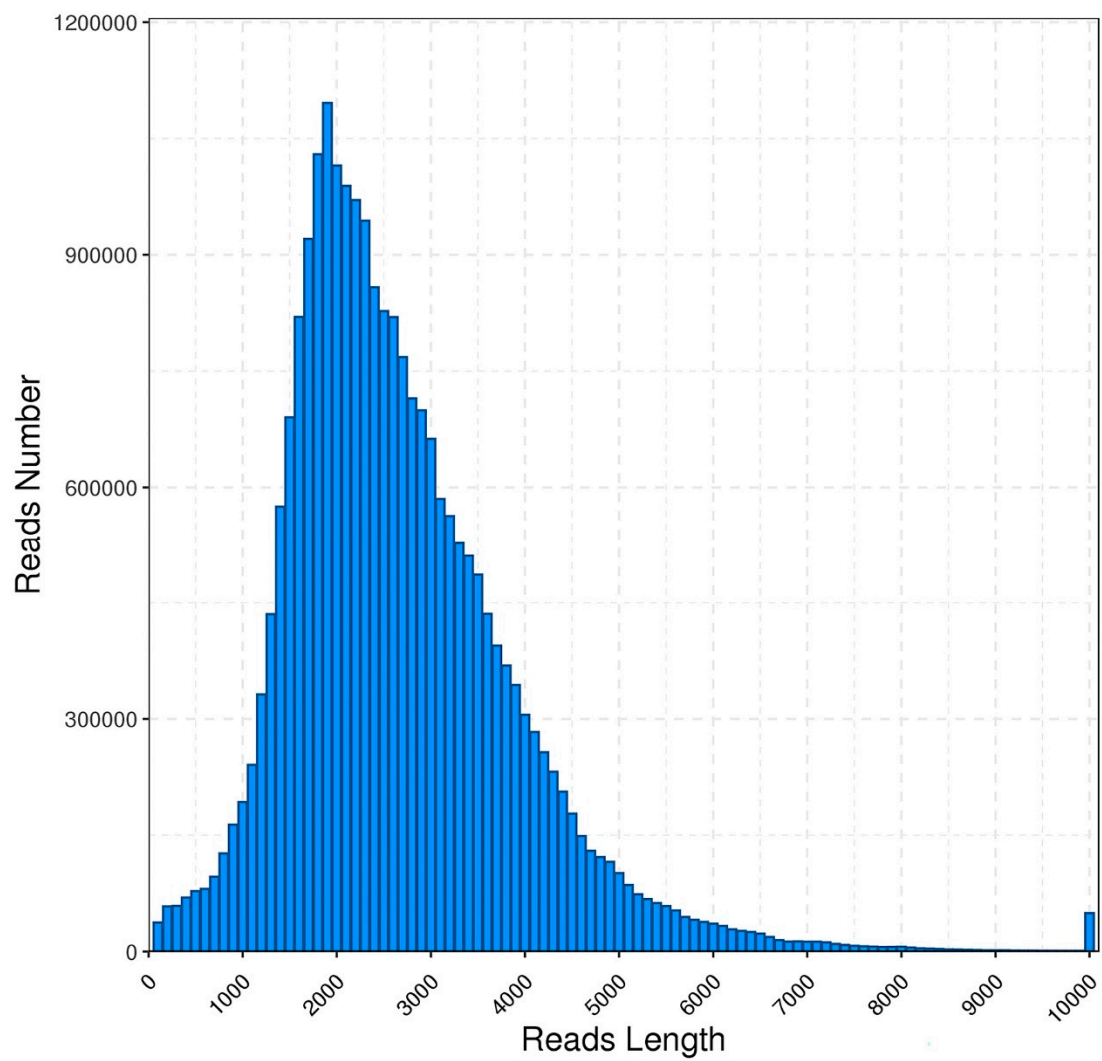

**Figure S1: length distribution of subreads from SMRT sequencing**

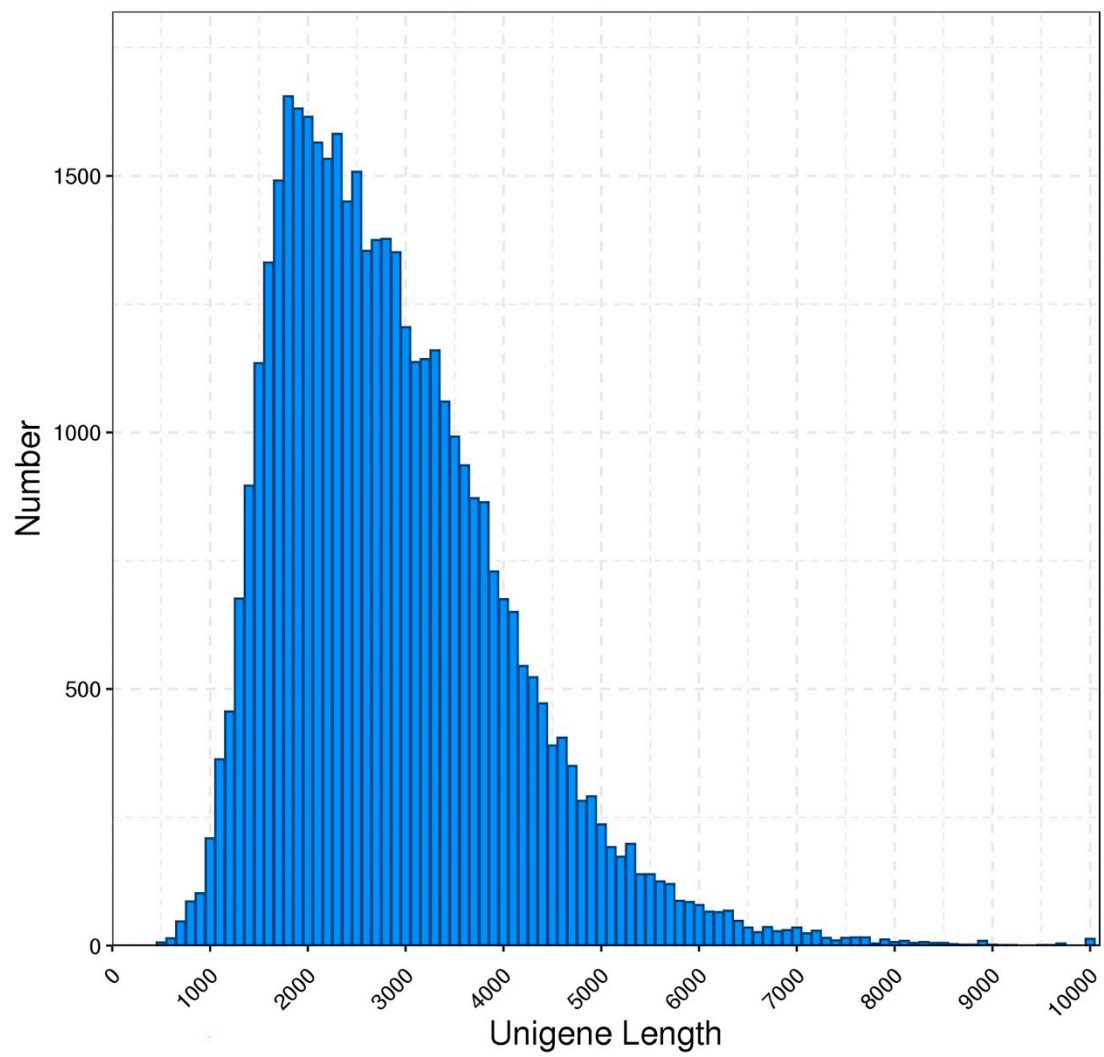

**Figure S2: length distribution of unigenes. The X-axis represents length (bp), the Y-axis represents the number of genes**

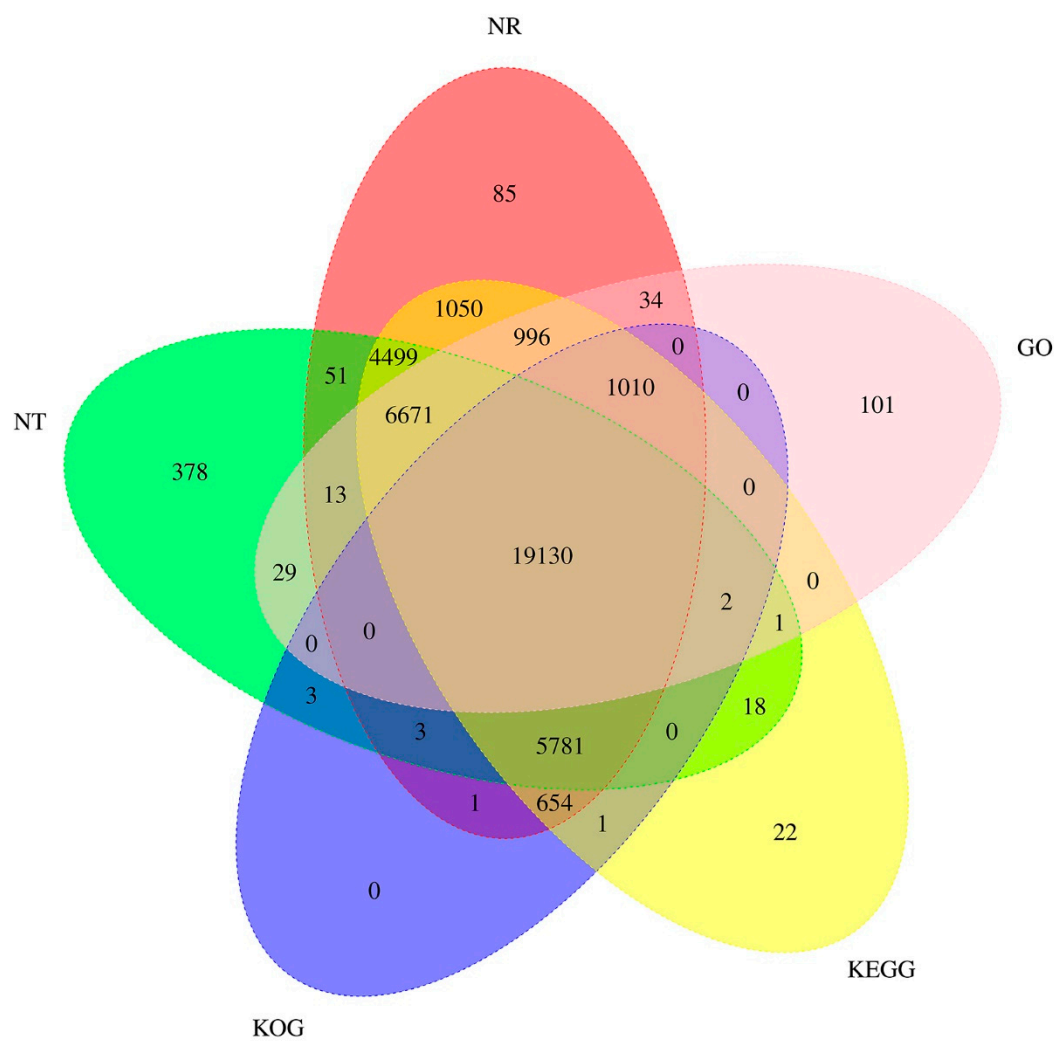

**Figure S3: Venn diagram of unigene annotation.**

The sum of the numbers in each large circle represents the number of unigenes for the database annotation, and the overlapping parts of the circles represent unigenes annotation results that are common among databases

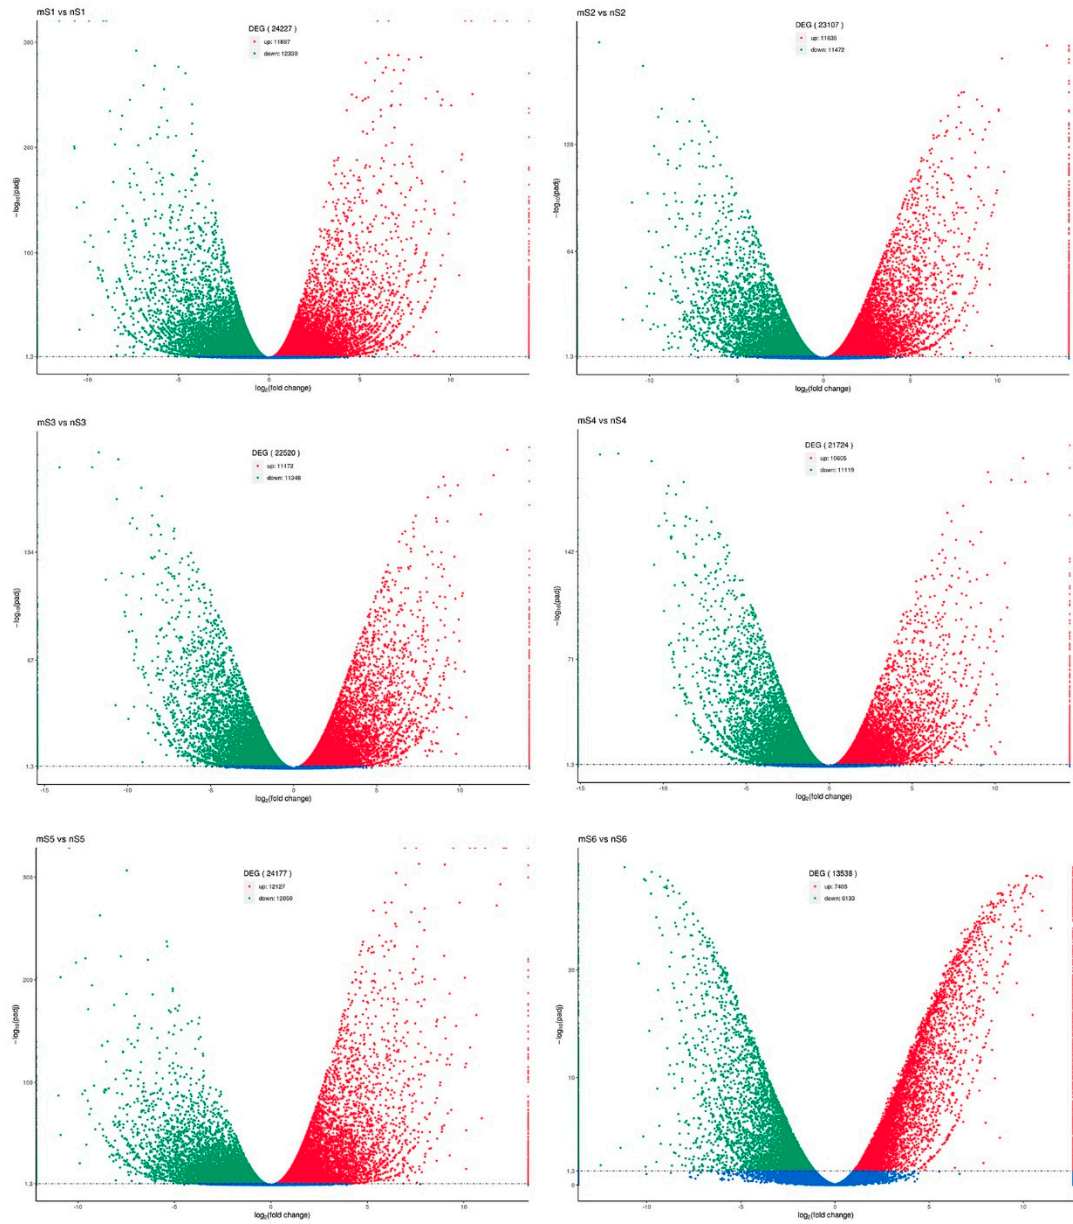

**Figure S4: DEGs at each stage.**

DEGs were then screened by comparing the genes expressed in two types of materials at the same developmental stage. Corrected  $p$ -value of 0.05 and  $\log_2$  (Fold change) of 1.5 were set as the threshold for significantly differential expression, values are means of three biological replicates

**Table S1: specific primers used for qRT-PCR verification**

| <b>No.</b> | <b>Name</b>     | <b>Forward</b>        | <b>Reverse</b>         | <b>Tm</b> | <b>size</b> |
|------------|-----------------|-----------------------|------------------------|-----------|-------------|
| 1          | <i>CoSEP3.1</i> | CTGTGCTTTGCGATGCTGAA  | GTCTCGAGCTCCTTGCTGTT   | 59        | 277         |
| 2          | <i>CoAGL6</i>   | GACGCTGAAGTGGCTCTCAT  | CTAGTTGTGCAAGCGCTCC    | 59        | 293         |
| 3          | <i>CoAP3</i>    | CCAGAAGGCTCTTGGGATCG  | TCGTTCGCGTACAATCGTCA   | 59        | 202         |
| 4          | <i>CoSEP3.2</i> | ATCTTGGCCCCCTAAACAGC  | TGTCGGCTGTAACCCACATC   | 59        | 238         |
| 5          | <i>CoGAPDH</i>  | GATAGTGTTACGGTCAATGGA | GCAGCAGCCTTATCCTTATCAG | 59        | 188         |

**Table S2: total reads of each sample and mapped reads against the reference sequence.**

| <b>Sample.name</b> | <b>Total.reads</b> | <b>Total.mapped</b> |
|--------------------|--------------------|---------------------|
| mS1_1              | 31615594           | 18664014(59.03%)    |
| mS1_2              | 31717608           | 18426428(58.10%)    |
| mS1_3              | 31953620           | 18399504(57.58%)    |
| mS2_1              | 31982686           | 19011318(59.44%)    |
| mS2_2              | 34913448           | 21028004(60.23%)    |
| mS2_3              | 33963842           | 20802142(61.25%)    |
| mS3_1              | 31861874           | 19243838(60.40%)    |
| mS3_2              | 32809414           | 19596368(59.73%)    |
| mS3_3              | 35707546           | 21333306(59.74%)    |
| mS4_1              | 32277182           | 18527666(57.40%)    |
| mS4_2              | 33129180           | 19602880(59.17%)    |
| mS4_3              | 33479692           | 19572580(58.46%)    |
| mS5_1              | 33153162           | 19452166(58.67%)    |
| mS5_2              | 34858064           | 20148052(57.80%)    |
| mS5_3              | 34317570           | 20668328(60.23%)    |
| mS6_1              | 34134634           | 20454666(59.92%)    |
| mS6_2              | 32625540           | 19897846(60.99%)    |
| mS6_3              | 32432544           | 19280460(59.45%)    |
| nS1_1              | 33421522           | 20117422(60.19%)    |
| nS1_2              | 32821080           | 20233020(61.65%)    |
| nS1_3              | 33321724           | 20340710(61.04%)    |
| nS2_1              | 32678562           | 19412806(59.41%)    |
| nS2_2              | 30681976           | 18543326(60.44%)    |
| nS2_3              | 32560624           | 19585152(60.15%)    |
| nS3_1              | 30996634           | 17949892(57.91%)    |
| nS3_2              | 31601274           | 18358150(58.09%)    |
| nS3_3              | 29809620           | 17895290(60.03%)    |
| nS4_1              | 33929032           | 19999706(58.95%)    |
| nS4_2              | 31422302           | 18846174(59.98%)    |
| nS4_3              | 34191026           | 20273568(59.29%)    |
| nS5_1              | 33503308           | 20051740(59.85%)    |
| nS5_2              | 32200108           | 18693640(58.05%)    |
| nS5_3              | 30052086           | 18640506(62.03%)    |
| nS6_1              | 30634964           | 16591566(54.16%)    |
| nS6_2              | 30259884           | 15687506(51.84%)    |
| nS6_3              | 30808730           | 18035174(58.54%)    |

Total reads represent clean data of sequencing reads after quality control; Total mapped represent the number of clean reads that can be matched to the reference sequence.
